# Supplementary material for: Enhanced fluorescence of phthalimide compounds induced by the incorporation of electron-donating alicyclic amino groups
Source: Royal Society of Chemistry journal article supplement (doi:10.1039/c8cp01999a), 2018-01-01
Supplement: c8cp01999a1.pdf [file c8cp01999a1.pdf]

## Electronic Supplementary Information (ESI)

### Enhanced Fluorescence of Phthalimide Compounds Induced by the Incorporation of Electron-Donating Alicyclic Amino Groups

Ryoji Orita<sup>†</sup>, Marius Franckevičius<sup>‡</sup>, Aurimas Vyšniauskas<sup>‡</sup>, Vidmantas Gulbinas<sup>‡</sup>, Haruki Sugiyama<sup>§</sup>, Hidehiro Uekusa<sup>§</sup>, Kenta Kanosue<sup>†</sup>, Ryohei Ishige<sup>†</sup>, and Shinji Ando<sup>\*†</sup>

- a. <sup>†</sup>Department of Chemical Science and Engineering, Tokyo Institute of Technology, Ookayama 2-12-1-E4-5, Meguro-ku, Tokyo 152-8552, Japan  
b. <sup>‡</sup>Center for Physical Sciences and Technology, Saulėtekio Av. 3, Vilnius LT-10257, Lithuania  
c. <sup>§</sup>Department of Chemistry, Tokyo Institute of Technology, Ookayama 2-12-1-H62, Meguro-ku, Tokyo 152-8552, Japan

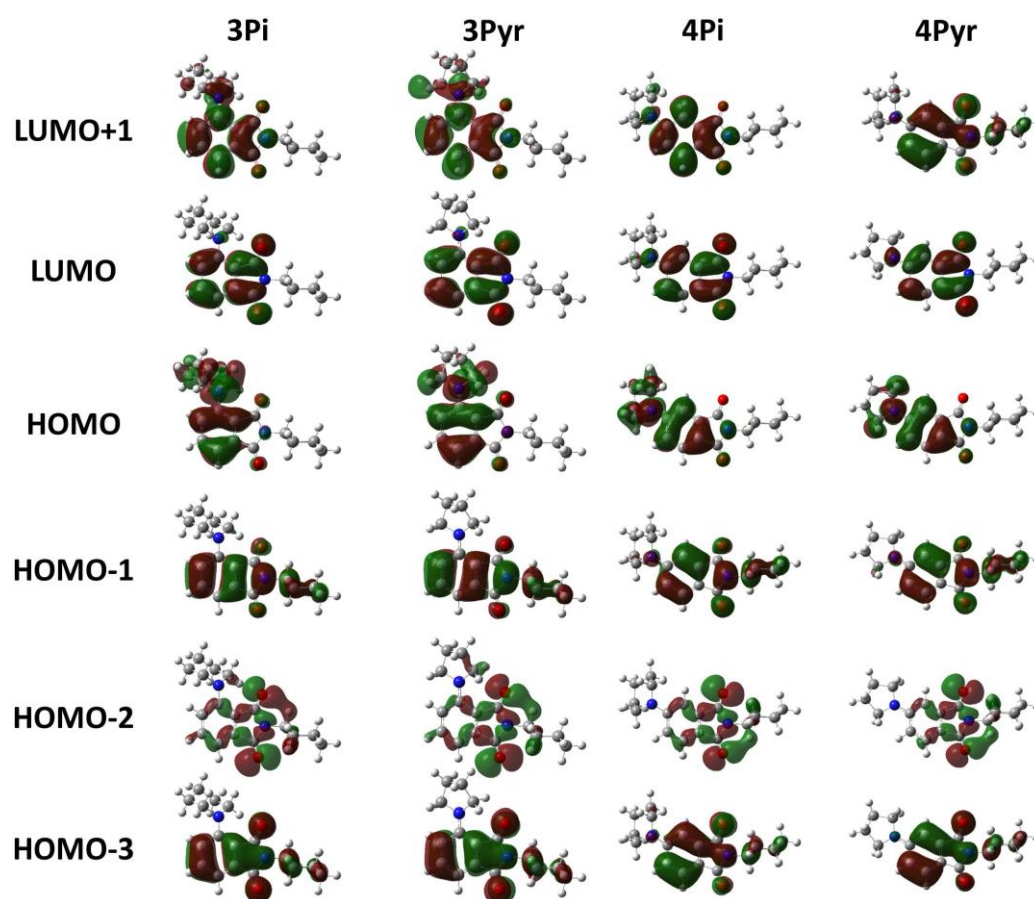

**Figure S1** Calculated molecular orbitals of x-NHPIs in the ground  $S_0$  state (TD-DFT method at the CAM-B3LYP/6-311+G(d,p) level).

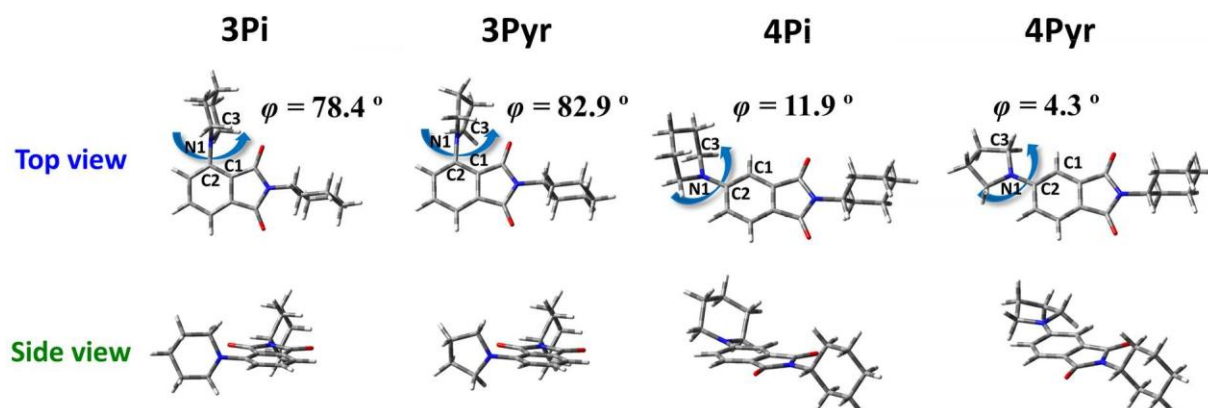

**FigureS2** Calculated optimized geometry (top and side view) of **x-NHPIs** in the  $S_1$  state and the atom labelling convention of **x-NHPIs**. The dihedral angles ( $\varphi$ ) of alicyclic amino group and phthalimide moiety for **x-NHPIs** are defined by C1-C2-N1-C3.

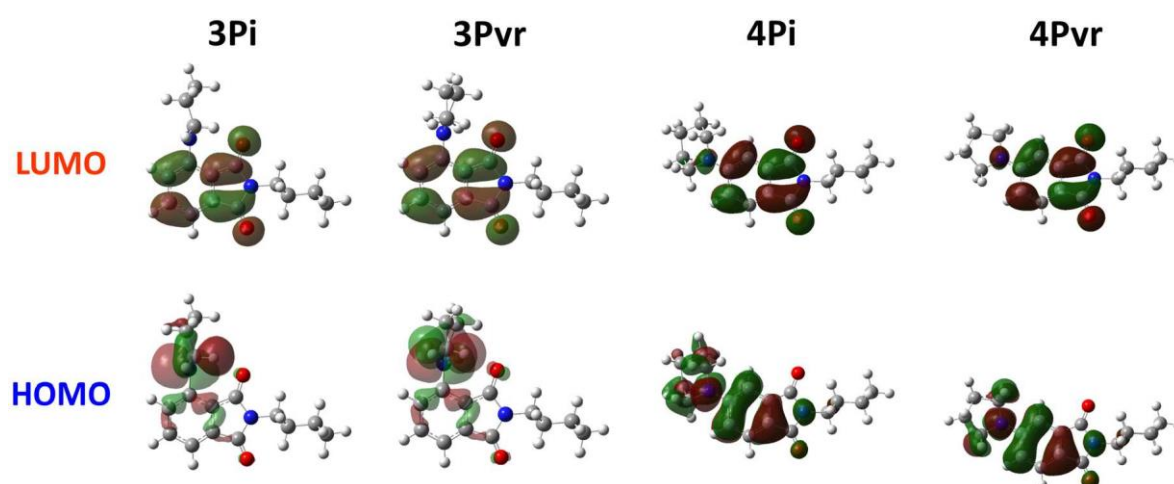

**FigureS3** Calculated molecular orbitals of **x-NHPIs** in the excited  $S_1$  state (TD-DFT method at the CAM-B3LYP/6-311+G(d,p) level).

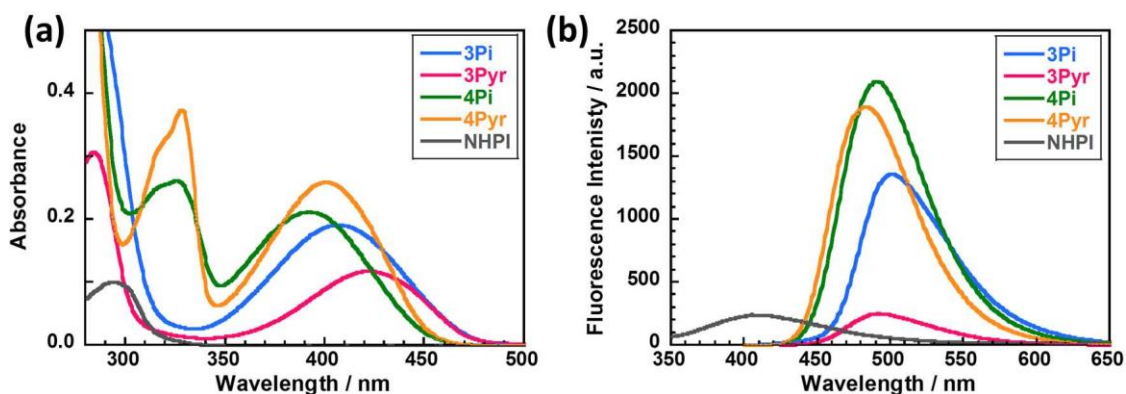

**FigureS4** (a) UV/Vis absorption spectra and (b) fluorescence spectra of **NHPI** and **x-NHPIs** in  $\text{CHCl}_3$  ( $5.0 \times 10^{-5}$  M). Excitation wavelengths for **NHPI** is 295 nm, and for **x-NHPIs** are listed in Table 1. The fluorescence intensities of **3Pi** and **3Pyr** are 10 times and that of **NHPI** is 100 times.

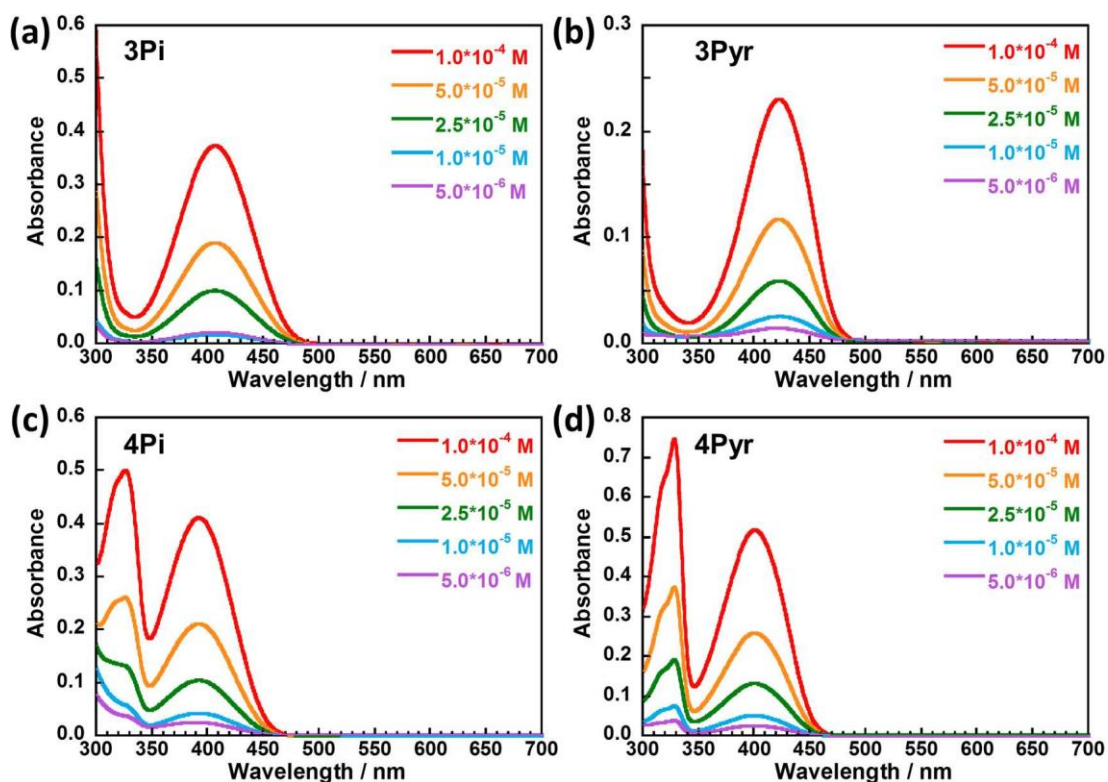

**FigureS5** UV/Vis absorption spectra of (a) **3Pi**, (b) **3Pyr**, (c) **4Pi**, and (d) **4Pyr** in  $\text{CHCl}_3$  at different concentrations ( $5.0 \times 10^{-6}$ – $1.0 \times 10^{-4}$  M).

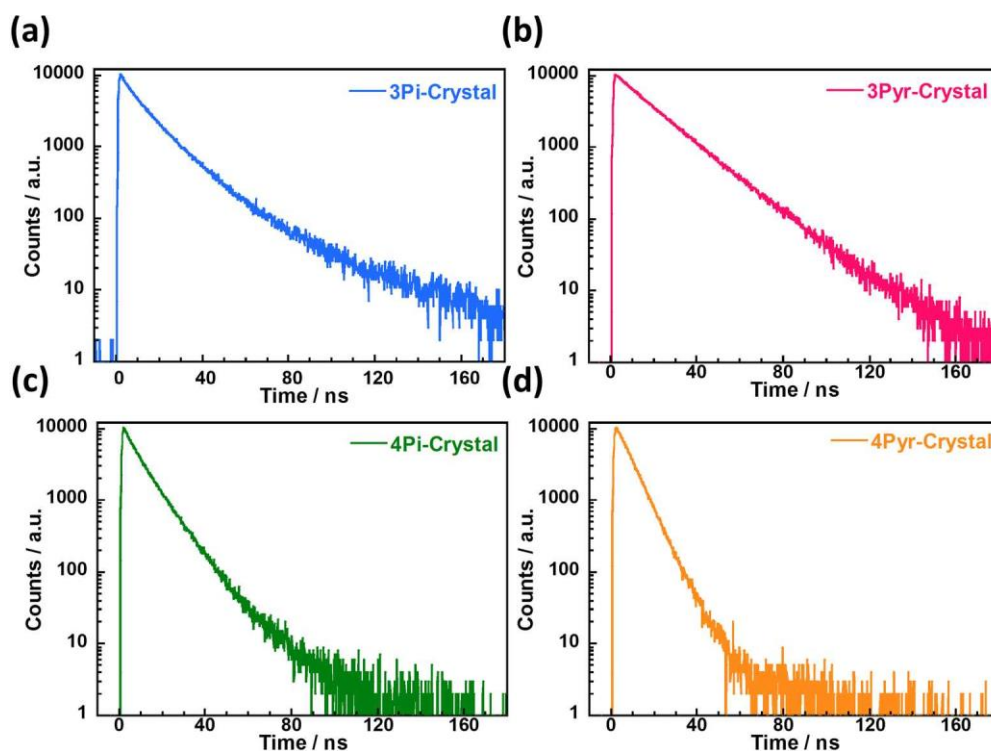

**FigureS6** Fluorescence decay profiles of (a) **3Pi**, (b) **3Pyr**, (c) **4Pi**, (d) **4Pyr** in crystalline state. The wavelength for excitation were set to 365 nm. The observed emission wavelengths ( $\lambda_{em}$ ) are 565 nm for **3Pi**, 550 nm for **3Pyr**, 490 nm for **4Pi**, 510 nm for **4Pyr**

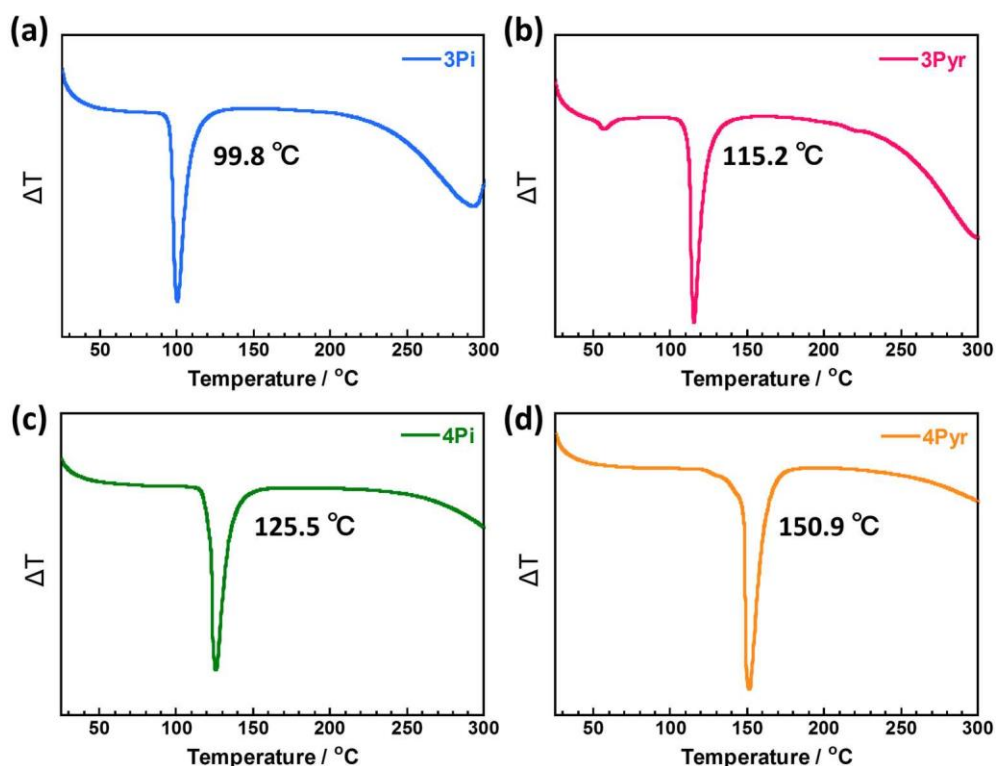

**FigureS7** DTA curves of crystalline samples of (a) **3Pi**, (b) **3Pyr**, (c) **4Pi**, (d) **4Pyr**. Melting point (°C) of each compound is shown in the figure.

**TableS1** Calculated electronic transitions of **x-NHPIs** in optimized  $S_1$  geometry.

| Compound    | State | Transition wavelength (nm) | Oscillator strength | Orbitals |        | Assignment          |
|-------------|-------|----------------------------|---------------------|----------|--------|---------------------|
| <b>3Pi</b>  | $S_1$ | 775.3                      | 0.0000              | HOMO     | → LUMO | CT( $\pi-\pi^*$ )   |
| <b>3Pyr</b> | $S_1$ | 796.1                      | 0.0000              | HOMO     | → LUMO | CT( $\pi-\pi^*$ )   |
| <b>4Pi</b>  | $S_1$ | 458.5                      | 0.0630              | HOMO     | → LUMO | HLCT( $\pi-\pi^*$ ) |
| <b>4Pyr</b> | $S_1$ | 445.2                      | 0.0595              | HOMO     | → LUMO | HLCT( $\pi-\pi^*$ ) |

**TableS2** Ground and excited state dipole moments for **x-NHPIs**.

| Compound    | Slope <sup>a</sup> | $a_0^b$ | $\mu_{g(cal)}^c$ | $\mu_{e(exp)}^d$ |
|-------------|--------------------|---------|------------------|------------------|
|             |                    | (A)     | (D)              | (D)              |
| <b>3Pi</b>  | 7387               | 4.66    | 3.62             | 12.6             |
| <b>3Pyr</b> | 5816               | 4.50    | 4.06             | 11.3             |
| <b>4Pi</b>  | 7494               | 4.59    | 4.87             | 13.4             |
| <b>4Pyr</b> | 7430               | 4.51    | 5.64             | 13.9             |

<sup>a</sup> The slopes of the linear relations in Figure 4, <sup>b</sup> the dipole moment in  $S_0$  state calculated by DFT calculations, <sup>c</sup> the Onsagar cavity radius obtained from Eq. (5), <sup>d</sup> the dipole moment in  $S_1$  state obtained from Eqs. (1) and (3).

**Table S3** Crystal data and structure refinement of **3Pi**.

|                                                     |                                                                 |                   |
|-----------------------------------------------------|-----------------------------------------------------------------|-------------------|
| Empirical formula                                   | C <sub>19</sub> H <sub>24</sub> N <sub>2</sub> O <sub>2</sub>   |                   |
| Formula weight                                      | 312.4                                                           |                   |
| Temperature                                         | 173(2) K                                                        |                   |
| Wavelength                                          | 1.54186 Å                                                       |                   |
| Crystal system                                      | Monoclinic                                                      |                   |
| Space group                                         | <i>P</i> 2 <sub>1</sub> /n                                      |                   |
| Unit cell dimensions                                | <i>a</i> = 6.7785(2) Å                                          |                   |
|                                                     | <i>b</i> = 9.8025(3) Å                                          | β = 94.7017(18)°. |
|                                                     | <i>c</i> = 25.4462(7) Å                                         |                   |
| Volume                                              | 1685.11(9) Å <sup>3</sup>                                       |                   |
| <i>Z</i>                                            | 4                                                               |                   |
| Density (calculated)                                | 1.231 g/cm <sup>3</sup>                                         |                   |
| Absorption coefficient                              | 0.636 mm <sup>-1</sup>                                          |                   |
| <i>F</i> (000)                                      | 672                                                             |                   |
| Crystal size                                        | 0.239 x 0.197 x 0.106 mm <sup>3</sup>                           |                   |
| Theta range for data collection                     | 3.486 to 68.253°.                                               |                   |
| Index ranges                                        | -8 ≤ <i>h</i> ≤ 8, -11 ≤ <i>k</i> ≤ 11, -30 ≤ <i>l</i> ≤ 30     |                   |
| Reflections collected                               | 29533                                                           |                   |
| Independent reflections                             | 3080 [ <i>R</i> (int) = 0.0422]                                 |                   |
| Completeness to theta = 67.686°                     | 99.9 %                                                          |                   |
| Absorption correction                               | Semi-empirical from equivalents                                 |                   |
| Max. and min. transmission                          | 0.936 and 0.815                                                 |                   |
| Refinement method                                   | Full-matrix least-squares on <i>F</i> <sup>2</sup>              |                   |
| Data / restraints / parameters                      | 3075 / 0 / 208                                                  |                   |
| Goodness-of-fit on <i>F</i> <sup>2</sup>            | 1.125                                                           |                   |
| Final <i>R</i> indices [ <i>I</i> > 2σ( <i>I</i> )] | <i>R</i> <sub>1</sub> = 0.0357, <i>wR</i> <sub>2</sub> = 0.0971 |                   |
| <i>R</i> indices (all data)                         | <i>R</i> <sub>1</sub> = 0.0404, <i>wR</i> <sub>2</sub> = 0.1001 |                   |
| Extinction coefficient                              | n/a                                                             |                   |
| Largest diff. peak and hole                         | 0.190 and -0.206 e.Å <sup>-3</sup>                              |                   |
| CCDC number                                         | 1815929                                                         |                   |

**TableS4** Crystal data and structure refinement of **3Pyr**.

|                                         |                                                                    |                       |
|-----------------------------------------|--------------------------------------------------------------------|-----------------------|
| Empirical formula                       | $C_{18}H_{22}N_2O_2$                                               |                       |
| Formula weight                          | 298.37                                                             |                       |
| Temperature                             | 173(2) K                                                           |                       |
| Wavelength                              | 1.54186 Å                                                          |                       |
| Crystal system                          | Monoclinic                                                         |                       |
| Space group                             | $P2_1/c$                                                           |                       |
| Unit cell dimensions                    | $a = 10.7455(9)$ Å                                                 |                       |
|                                         | $b = 26.6113(17)$ Å                                                | $= 99.080(4)^\circ$ . |
|                                         | $c = 10.8489(7)$ Å                                                 |                       |
| Volume                                  | $3063.4(4)$ Å <sup>3</sup>                                         |                       |
| $Z$                                     | 8                                                                  |                       |
| Density (calculated)                    | 1.294 g/cm <sup>3</sup>                                            |                       |
| Absorption coefficient                  | 0.675 mm <sup>-1</sup>                                             |                       |
| $F(000)$                                | 1280                                                               |                       |
| Crystal size                            | 0.338 x 0.099 x 0.098 mm <sup>3</sup>                              |                       |
| Theta range for data collection         | 4.166 to 68.247°.                                                  |                       |
| Index ranges                            | $-12 \leq h \leq 12$ , $-32 \leq k \leq 32$ , $-13 \leq l \leq 12$ |                       |
| Reflections collected                   | 34608                                                              |                       |
| Independent reflections                 | 5591 [ $R(\text{int}) = 0.1072$ ]                                  |                       |
| Completeness to $\theta = 67.686^\circ$ | 100.00 %                                                           |                       |
| Absorption correction                   | Semi-empirical from equivalents                                    |                       |
| Max. and min. transmission              | 0.937 and 0.664                                                    |                       |
| Refinement method                       | Full-matrix least-squares on $F^2$                                 |                       |
| Data / restraints / parameters          | 5591 / 0 / 397                                                     |                       |
| Goodness-of-fit on $F^2$                | 0.833                                                              |                       |
| Final $R$ indices [ $I > 2\sigma(I)$ ]  | $R_1 = 0.0489$ , $wR_2 = 0.0944$                                   |                       |
| $R$ indices (all data)                  | $R_1 = 0.0917$ , $wR_2 = 0.1187$                                   |                       |
| Extinction coefficient                  | n/a                                                                |                       |
| Largest diff. peak and hole             | 0.241 and -0.232 e.Å <sup>-3</sup>                                 |                       |
| CCDC number                             | 1815930                                                            |                       |

**Table S5** Crystal data and structure refinement of **4Pi**.

|                                         |                                                                  |                                |
|-----------------------------------------|------------------------------------------------------------------|--------------------------------|
| Empirical formula                       | $C_{19}H_{24}N_2O_2$                                             |                                |
| Formula weight                          | 312.4                                                            |                                |
| Temperature                             | 173(2) K                                                         |                                |
| Wavelength                              | 1.54186 Å                                                        |                                |
| Crystal system                          | Triclinic                                                        |                                |
| Space group                             | $P\bar{1}$                                                       |                                |
| Unit cell dimensions                    | $a = 5.26649(14)$ Å                                              | $\alpha = 72.6185(17)^\circ$ . |
|                                         | $b = 10.6373(3)$ Å                                               | $= 89.9112(17)^\circ$ .        |
|                                         | $c = 15.2944(5)$ Å                                               | $\gamma = 83.0728(16)^\circ$ . |
| Volume                                  | 811.18(4) Å <sup>3</sup>                                         |                                |
| $Z$                                     | 2                                                                |                                |
| Density (calculated)                    | 1.279 g/cm <sup>3</sup>                                          |                                |
| Absorption coefficient                  | 0.660 mm <sup>-1</sup>                                           |                                |
| $F(000)$                                | 336                                                              |                                |
| Crystal size                            | 0.324 x 0.058 x 0.055 mm <sup>3</sup>                            |                                |
| Theta range for data collection         | 3.030 to 68.139°.                                                |                                |
| Index ranges                            | $-6 \leq h \leq 6$ , $-12 \leq k \leq 12$ , $-18 \leq l \leq 18$ |                                |
| Reflections collected                   | 9616                                                             |                                |
| Independent reflections                 | 2924 [ $R(\text{int}) = 0.0671$ ]                                |                                |
| Completeness to $\theta = 67.686^\circ$ | 98.40 %                                                          |                                |
| Absorption correction                   | Semi-empirical from equivalents                                  |                                |
| Max. and min. transmission              | 0.965 and 0.736                                                  |                                |
| Refinement method                       | Full-matrix least-squares on $F^2$                               |                                |
| Data / restraints / parameters          | 2924 / 0 / 304                                                   |                                |
| Goodness-of-fit on $F^2$                | 0.968                                                            |                                |
| Final $R$ indices [ $I > 2\sigma(I)$ ]  | $R_1 = 0.0530$ , $wR_2 = 0.1298$                                 |                                |
| $R$ indices (all data)                  | $R_1 = 0.0677$ , $wR_2 = 0.1497$                                 |                                |
| Extinction coefficient                  | n/a                                                              |                                |
| Largest diff. peak and hole             | 0.253 and -0.234 e.Å <sup>-3</sup>                               |                                |
| CCDC number                             | 1815931                                                          |                                |



**TableS6** Crystal data and structure refinement of 4Pyr.

|                                             |                                                                  |                             |
|---------------------------------------------|------------------------------------------------------------------|-----------------------------|
| Empirical formula                           | $C_{18}H_{22}N_2O_2$                                             |                             |
| Formula weight                              | 298.37                                                           |                             |
| Temperature                                 | 173(2) K                                                         |                             |
| Wavelength                                  | 1.54186 Å                                                        |                             |
| Crystal system                              | Monoclinic                                                       |                             |
| Space group                                 | $P 2_1/c$                                                        |                             |
| Unit cell dimensions                        | $a = 5.1353(2)$ Å                                                |                             |
|                                             | $b = 10.3387(4)$ Å                                               | $\beta = 92.523(3)^\circ$ . |
|                                             | $c = 29.0552(12)$ Å                                              |                             |
| Volume                                      | 1541.11(10) Å <sup>3</sup>                                       |                             |
| <i>Z</i>                                    | 4                                                                |                             |
| Density (calculated)                        | 1.286 g/cm <sup>3</sup>                                          |                             |
| Absorption coefficient                      | 0.671 mm <sup>-1</sup>                                           |                             |
| <i>F</i> (000)                              | 640                                                              |                             |
| Crystal size                                | 0.271 x 0.106 x 0.100 mm <sup>3</sup>                            |                             |
| Theta range for data collection             | 3.045 to 68.220°.                                                |                             |
| Index ranges                                | $-6 \leq h \leq 6$ , $-12 \leq k \leq 12$ , $-34 \leq l \leq 34$ |                             |
| Reflections collected                       | 17004                                                            |                             |
| Independent reflections                     | 2818 [ $R(\text{int}) = 0.0540$ ]                                |                             |
| Completeness to theta = 67.686°             | 100.00 %                                                         |                             |
| Absorption correction                       | Semi-empirical from equivalents                                  |                             |
| Max. and min. transmission                  | 0.936 and 0.0481104                                              |                             |
| Refinement method                           | Full-matrix least-squares on $F^2$                               |                             |
| Data / restraints / parameters              | 2818 / 0 / 287                                                   |                             |
| Goodness-of-fit on $F^2$                    | 0.961                                                            |                             |
| Final <i>R</i> indices [ $I > 2\sigma(I)$ ] | $R_1 = 0.0396$ , $wR_2 = 0.0862$                                 |                             |
| <i>R</i> indices (all data)                 | $R_1 = 0.0504$ , $wR_2 = 0.0906$                                 |                             |
| Extinction coefficient                      | n/a                                                              |                             |
| Largest diff. peak and hole                 | 0.233 and -0.161 e.Å <sup>-3</sup>                               |                             |
| CCDC number                                 | 1815932                                                          |                             |
